# Supplementary material for: Changes in Nutritional Status and Musculoskeletal Health in a Geriatric Post-Fall Care Plan Setting
Source: Nutrients. 2019 Jul 9;11(7):1551. doi: 10.3390/nu11071551 (PMC6682897; doi:10.3390/nu11071551)
Supplement: Supplementary file 1 [file nutrients-11-01551-s001.pdf]

**Table S1.** The Charlson age-comorbidity index (CACI).

| #   | Comorbid condition                | Weight |
|-----|-----------------------------------|--------|
| 1   | Myocardial infarction             | 1      |
| 2   | Congestive heart failure          |        |
| 3   | Peripheral vascular disease       |        |
| 4   | Cerebrovascular disease           |        |
| 5   | Chronic pulmonary disease         |        |
| 6   | Connective tissue disease         |        |
| 7   | Ulcer disease                     |        |
| 8   | Mild liver disease                |        |
| 9   | Diabetes                          |        |
| 10  | Hemiplegia                        | 2      |
| 11  | Moderate/severe renal disease     |        |
| 12  | Diabetes with end-organ damage    |        |
| 13  | Any tumor                         |        |
| 14  | Leukemia                          |        |
| 15  | Lymphoma                          | 3      |
| 16  | Moderate/severe liver disease     |        |
| 17  | Metastatic solid tumor            | 6      |
| 18  | AIDS                              |        |
| Age | For each decade over age 40 years | 1      |

AIDS= Acquired immune deficiency syndrome; adapted from Charlson et al.[1]

The Charlson comorbidity index (CCI) is a tool that was originally developed to facilitate classification of comorbidities in longitudinal studies [2]. Seven years following the publication of their original work, Charlson et al. proposed that a modified, combined age-comorbidity index (Charlson age-comorbidity index (CACI)) could be helpful in smaller studies with a more limited number of outcome events [1]. The CACI, whose validity and reliability has been demonstrated in various geriatric patients, combines 19 medical conditions, weighted 1 to 6, with age weighted 1 for every decade past 40 years old (Table S1).

## References

1. Charlson, M.; Szatrowski, T.P.; Peterson, J.; Gold, J. Validation of a combined comorbidity index. *J Clin Epidemiol* **1994**, *47*, 1245-1251.
2. Charlson, M.E.; Pompei, P.; Ales, K.L.; MacKenzie, C.R. A new method of classifying prognostic comorbidity in longitudinal studies: development and validation. *J Chronic Dis* **1987**, *40*, 373-383.

**Table S2.** Cross-sectional associations of baseline nutritional status with baseline musculoskeletal outcomes.

| Baseline Musculoskeletal Outcome | Baseline Nutritional Status |                             | <i>n</i> | Age-Sex Adjusted $\beta$ (95% CI) | Multivariable Adjusted $\beta$ (95% CI) |
|----------------------------------|-----------------------------|-----------------------------|----------|-----------------------------------|-----------------------------------------|
| Grip strength, kg                | Continuous <sup>b</sup>     | 1-point higher in MNA score | 104      | 0.23 (-0.05, 0.52)                | -0.02 (-0.21, 0.27)                     |
| Gait speed, m/sec                |                             |                             | 100      | 0.02 (0.00, 0.03) <sup>i</sup>    | -0.00 (-0.02, 0.01)                     |
| log (TUG), sec                   |                             |                             | 98       | -0.01 (-0.03, 0.01)               | 0.01 (-0.01, 0.03)                      |
| SPPB, score                      |                             |                             | 103      | 0.14 (0.05, 0.23) <sup>ii</sup>   | 0.00 (-0.09, 0.10)                      |
| log (CTx), ng/L                  |                             |                             | 93       | -0.01 (-0.04, 0.02)               | 0.00 (-0.03, 0.04)                      |

MNA= Mini Nutritional Assessment; TUG test= Timed Up and Go test; SPPB= Short Physical Performance Battery; CTX= C-terminal telopeptide of type 1 collagen; <sup>iii</sup>:  $p<0.001$ , <sup>ii</sup>  $p<0.01$ , <sup>i</sup>  $p<0.05$  for multiple linear regression models testing the associations between baseline MNA score with baseline musculoskeletal outcomes; <sup>b</sup>  $\beta$  coefficient is the 1-unit increase in baseline musculoskeletal outcome associated with a 1-point increase in baseline MNA score. Age-sex model adjusted for age and sex. Multivariable model adjusted for baseline variables (age, sex, GDS, CACI, number of medications – all continuous except sex).
